# Supplementary material for: Enhanced electrocatalytic oxygen redox reactions of iron oxide nanorod films by combining oxygen vacancy formation and cobalt doping
Source: Royal Society of Chemistry journal article supplement (doi:10.1039/d3ra03394e), 2023-01-01
Supplement: d3ra03394e1.pdf [file d3ra03394e1.pdf]

## Supporting information

### **Enhanced electrocatalytic oxygen redox reactions of iron oxide nanorod films by combining oxygen vacancy formation and cobalt doping**

Saleh Omar ben Gubaer,<sup>a,1</sup> Maged N. Shaddad,<sup>b,1</sup> Prabhakarn Arunachalam,<sup>a\*</sup> Mabrook S Amer,<sup>a,</sup>  
<sup>c</sup> Saba A. Aladeemy,<sup>b</sup> Abdullah M Al-Mayouf<sup>a,c,\*</sup>

<sup>a</sup>Electrochemical Sciences Research Chair (ESRC), Chemistry Department, College of Science, King Saud University, Riyadh 11451, Saudi Arabia.

<sup>b</sup>Department of Chemistry, College of Science and Humanities in Al-Kharj, Prince Sattam Bin Abdulaziz University, P.O. Box 173, Al-Kharj 11942, Saudi Arabia.

<sup>c</sup>K.A.CARE Energy Research and Innovation Center at Riyadh, 11454, Saudi Arabia.

Corresponding authors

\*parunachalam@ksu.edu.sa (P. Arunachalam), amayouf@ksu.edu.sa (A. M. Al-Mayouf),

Tel:+96614675959 Fax:+96614675992

<sup>1</sup>These authors contributed equally to this work.

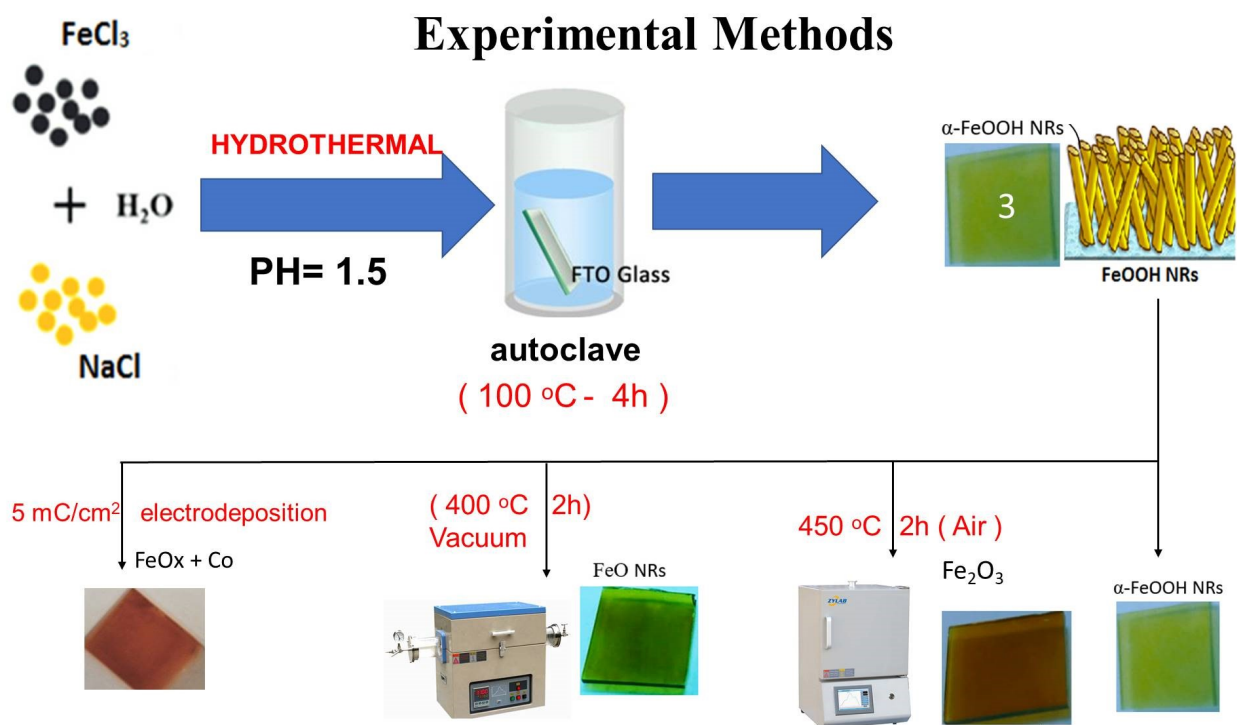

**Figure S1.** Schematic illustration of the synthesis procedures of fabricated  $\alpha\text{-FeOOH}$ ,  $\text{Fe}_2\text{O}_3$ , FeO, and Co-doped FeO NRs materials.

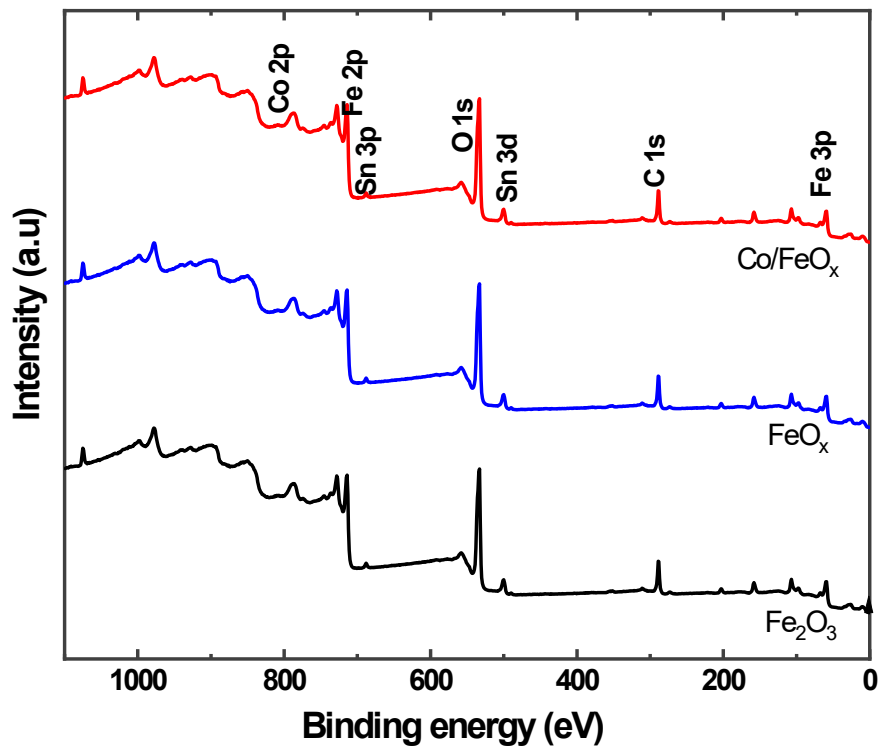

**Figure S2.** Comparative XPS survey spectra of fabricated Fe<sub>2</sub>O<sub>3</sub>, FeO<sub>x</sub>, and Co-doped FeO<sub>x</sub> electrodes fabricated by hydrothermal and electrodeposition approaches

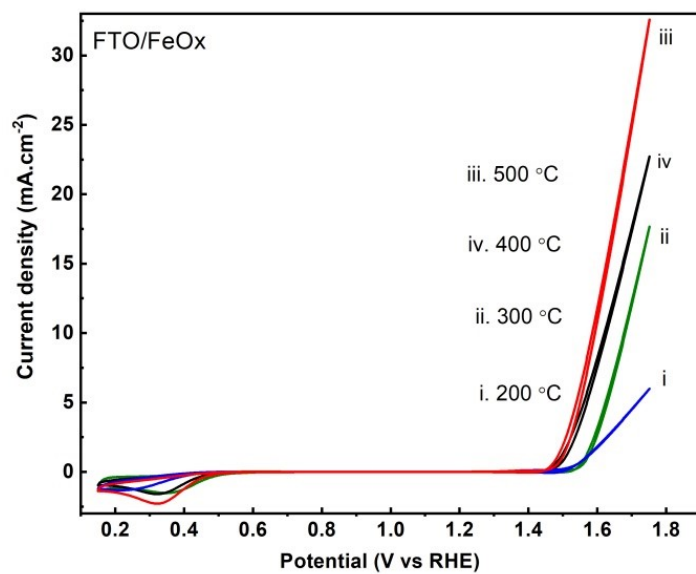

**Figure S3.** Cyclic voltammetric plots FeO<sub>x</sub>/FTO electrode after annealing under Vacuum at different annealing temperatures (in 1.0 M KOH (pH 13.6) with scan rate 10 mVs<sup>-1</sup>)

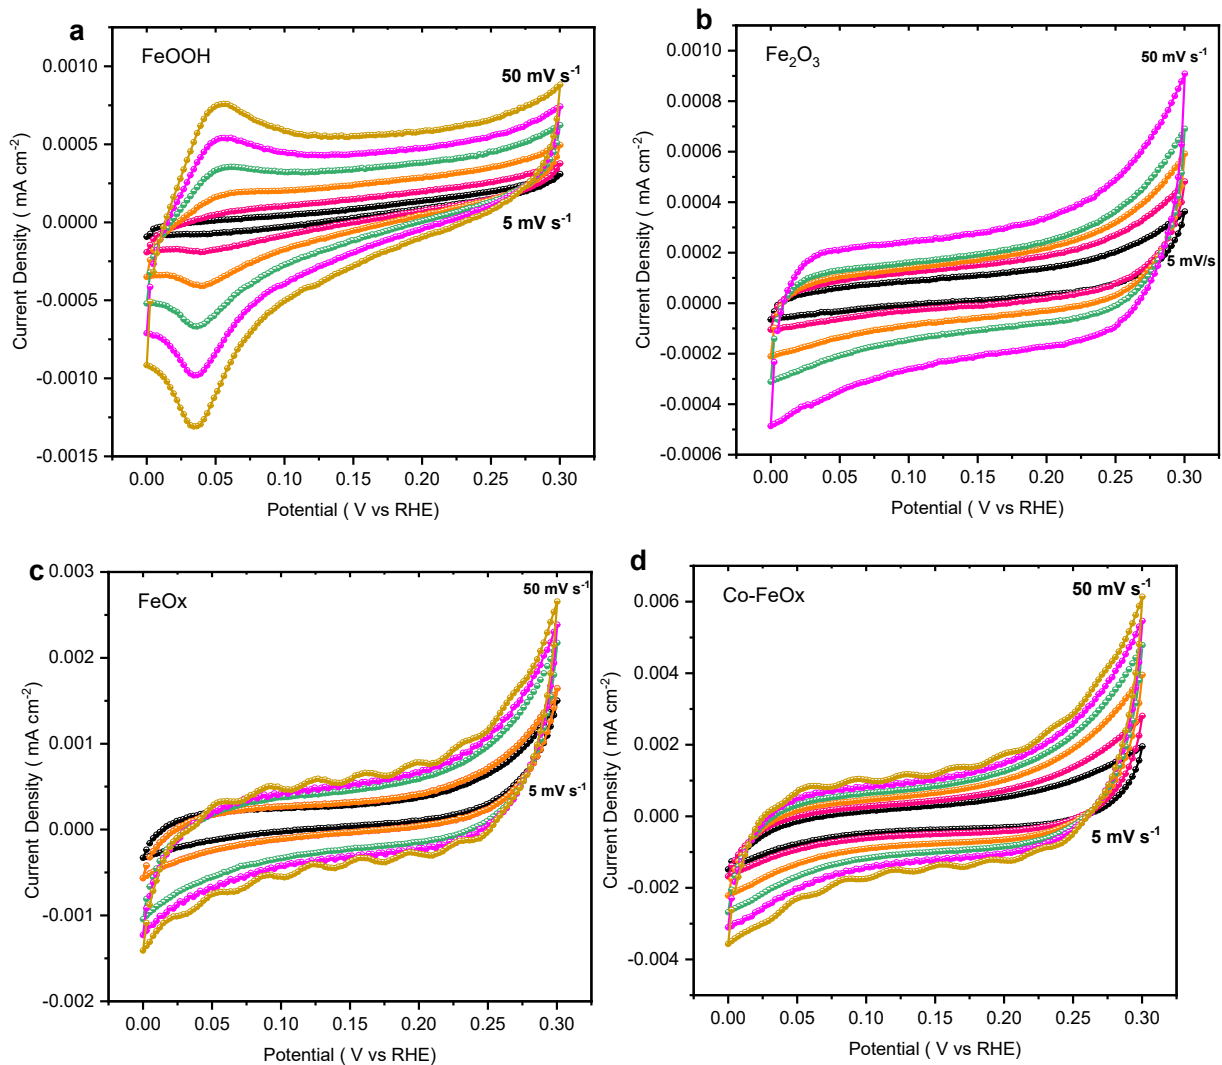

**Figure S4. Electrochemical surface area measurements.** Cyclic voltammograms of a) FeOOH, Fe<sub>2</sub>O<sub>3</sub> (b), FeOx (c), Co-doped FeOx (d) electrodes at various scan rates.

**Table S1.** Impedance parameter values derived from the fitting to the equivalent circuit for the impedance spectra recorded in 1.0 M KOH solution with an applied potential of 1.6 V vs RHE.  $R_s$  = solution resistance,  $R_{ct}$  = charge-transfer resistance,.

| Materials                   | $R_s, \Omega$ | CPE, $\mu\text{Mho}$ | $R_{ct}, \Omega$ | n     |
|-----------------------------|---------------|----------------------|------------------|-------|
| $\text{Fe}_2\text{O}_3$ NRs | 35            | 6.02                 | 55.6             | 0.587 |
| $\alpha\text{-FeOOH}$ NRs   | 21            | 88.2                 | 17.9             | 0.764 |
| $\text{FeO}_x$ NRs          | 17.5          | 2.84                 | 6.65             | 0.700 |
| $\text{Co/FeO}_x$ NRs       | 11.5          | 10.4                 | 2.61             | 0.65  |
